# Supplementary material for: Selective ion probe for Mg2+ based on Au(i)⋯Au(i) interactions in a tripodal alkynylgold(i) complex with oligoether pendants
Source: Royal Society of Chemistry journal article supplement (doi:10.1039/b902690h), 2009-01-01
Supplement: b902690h.pdf [file b902690h.pdf]

## Supplementary information

### Selective ion probe for $\text{Mg}^{2+}$ based on $\text{Au(I)}\cdots\text{Au(I)}$ interactions in tripodal alkynylgold(I) complex with oligoether pendants

Xiaoming He, Eddie Chung-Chin Cheng, Nianyong Zhu and Vivian Wing-Wah Yam\*

*Centre for Carbon-Rich Molecular and Nano-Scale Metal-Based Materials Research and  
Department of Chemistry, The University of Hong Kong, Pokfulam Road, Hong Kong SAR,  
People's Republic of China.*

#### Experimental Procedure:

##### (1) Ligand synthesis and characterization

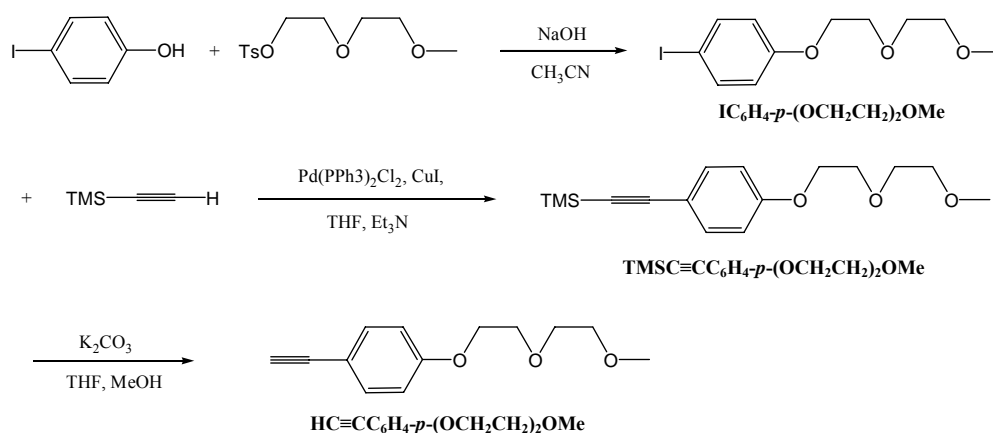

##### $\text{IC}_6\text{H}_4\text{-}p\text{-(OCH}_2\text{CH}_2)_2\text{OMe}$

$^1\text{H}$  NMR ( $\text{CDCl}_3$ , 400 MHz, relative to  $\text{Me}_4\text{Si}$ ):  $\delta$  3.39 (3H, s,  $-\text{OCH}_3$ ), 3.58 (2H, t,  $J = 4.4$  Hz,  $-\text{OCH}_2-$ ), 3.71 (2H, t,  $J = 4.4$  Hz,  $-\text{OCH}_2-$ ), 3.85 (2H, t,  $J = 4.7$  Hz,  $-\text{OCH}_2-$ ), 4.11 (2H, t,  $J = 4.7$  Hz,  $-\text{OCH}_2-$ ), 6.70 (2H, d,  $J = 8.6$  Hz,  $-\text{C}_6\text{H}_4-$ ), 7.54 (2H, d,  $J = 8.6$  Hz,  $-\text{C}_6\text{H}_4-$ ). Elemental analysis, Anal. Found (%): C, 40.92; H, 4.62. Calcd. For  $\text{C}_{11}\text{H}_{15}\text{IO}_3$ : C, 41.01; H, 4.69.

**TMSC≡CC<sub>6</sub>H<sub>4</sub>-*p*-(OCH<sub>2</sub>CH<sub>2</sub>)<sub>2</sub>OMe**

<sup>1</sup>H NMR (CDCl<sub>3</sub>, 400 MHz, relative to Me<sub>4</sub>Si): δ 0.24 (9H, s, -SiMe<sub>3</sub>), 3.39 (3H, s, -OCH<sub>3</sub>), 3.59 (2H, t, *J* = 4.6 Hz, -OCH<sub>2</sub>-), 3.72 (2H, t, *J* = 4.6 Hz, -OCH<sub>2</sub>-), 3.86 (2H, t, *J* = 4.8 Hz, -OCH<sub>2</sub>-), 4.14 (2H, t, *J* = 4.8 Hz, -OCH<sub>2</sub>-), 6.83 (2H, d, *J* = 8.7 Hz, -C<sub>6</sub>H<sub>4</sub>-), 7.39 (2H, d, *J* = 8.7 Hz, -C<sub>6</sub>H<sub>4</sub>-).  
Elemental analysis, Anal. Found (%): C, 65.53; H, 8.29. Calcd. For C<sub>16</sub>H<sub>24</sub>O<sub>3</sub>Si: C, 65.71; H, 8.27.

**HC≡CC<sub>6</sub>H<sub>4</sub>-*p*-(OCH<sub>2</sub>CH<sub>2</sub>)<sub>2</sub>OMe**

<sup>1</sup>H NMR (CDCl<sub>3</sub>, 400 MHz, relative to Me<sub>4</sub>Si): δ 2.99 (1H, s, C≡CH), 3.39 (3H, s, -OCH<sub>3</sub>), 3.58 (2H, t, *J* = 4.6 Hz, -OCH<sub>2</sub>-), 3.71 (2H, t, *J* = 4.6 Hz, -OCH<sub>2</sub>-), 3.85 (2H, t, *J* = 4.9 Hz, -OCH<sub>2</sub>-), 4.14 (2H, t, *J* = 4.9 Hz, -OCH<sub>2</sub>-), 6.85 (2H, d, *J* = 8.7 Hz, -C<sub>6</sub>H<sub>4</sub>-), 7.41 (2H, d, *J* = 8.7 Hz, -C<sub>6</sub>H<sub>4</sub>-).  
Elemental analysis, Anal. Found (%): C, 70.85; H, 7.39. Calcd. For C<sub>13</sub>H<sub>16</sub>O<sub>3</sub>: C, 70.89; H, 7.32.

**(2) Complexes 1-3 synthesis and characterization**

**[Au<sub>3</sub>(Triphos){C≡CC<sub>6</sub>H<sub>4</sub>-*p*-(OCH<sub>2</sub>CH<sub>2</sub>)<sub>2</sub>OMe}<sub>3</sub>] (1)**

To a dichloromethane solution of [Au(C≡C-L)]<sub>∞</sub> (100 mg, 0.24 mmol) was added a solid sample of 1,1,1-tris(diphenylphosphinomethyl)ethane (50 mg, 0.08 mmol) under a nitrogen atmosphere. After it was stirred for 2 hours, the reaction became clear and the solvent was evaporated under reduced pressure. Recrystallization by layering *n*-hexane onto a concentrated dichloromethane solution of the product afforded **1** as white crystals. Yield: 82 mg, 53 %. <sup>1</sup>H NMR (CDCl<sub>3</sub>, 400 MHz, relative to Me<sub>4</sub>Si): δ 0.76 (3H, s, -CH<sub>3</sub>), 3.39 (9H, s, -OCH<sub>3</sub>), 3.51 (6H, d, *J* = 10.6 Hz, -CH<sub>2</sub>P-), 3.57 (6H, t, *J* = 4.7 Hz, -OCH<sub>2</sub>-), 3.72 (6H, t, *J* = 4.7 Hz, -OCH<sub>2</sub>-), 3.85 (6H, t, *J* = 4.9 Hz, -OCH<sub>2</sub>-), 4.13 (6H, t, *J* = 4.9 Hz, -OCH<sub>2</sub>-), 6.80 (6H, d, *J* = 8.8 Hz, -C<sub>6</sub>H<sub>4</sub>-), 7.41 (24H, m, -PPh<sub>2</sub> and -C<sub>6</sub>H<sub>4</sub>-), 8.01 (12H, m, -PPh<sub>2</sub>). <sup>31</sup>P NMR (CDCl<sub>3</sub>, 202 MHz, relative to 85 % H<sub>3</sub>PO<sub>4</sub>): δ

27.79. Elemental analysis, Anal. Found (%): C, 51.40; H, 4.55. Calcd. for  $C_{80}H_{84}Au_3O_9P_3$ : C, 51.29; H, 4.52. FAB-MS  $m/z$  1654  $[M-L]^+$ .

**$[Au_3(Triphos)(C\equiv CC_6H_4OMe-p)_3]$  (2)**

This was prepared according to the procedure for **1** except  $[Au(C\equiv CC_6H_4OMe-p)]_\infty$  (80 mg, 0.24 mmol) was used instead of  $[Au(C\equiv C-L)]_\infty$ . The product was recrystallized from dichloromethane-*n*-hexane to give **2** as yellow crystals. Yield 100 mg, 77 %.  $^1H$  NMR ( $CDCl_3$ , 400 MHz, relative to  $Me_4Si$ ):  $\delta$  0.77 (3H, s,  $-CH_3$ ), 3.51 (6H, d,  $J = 10.7$  Hz,  $-CH_2P-$ ), 3.80 (9H, s,  $-OCH_3$ ), 6.80 (6H, d,  $J = 8.8$  Hz,  $-C_6H_4-$ ), 7.42 (24H, m,  $-PPh_2$  and  $-C_6H_4-$ ), 8.02 (12H, m,  $-PPh_2$ ).  $^{31}P$  NMR ( $CDCl_3$ , 202 MHz, relative to 85 %  $H_3PO_4$ ):  $\delta$  26.65. Elemental analysis, Anal. Found (%): C, 50.53; H, 3.85. Calcd. For  $C_{68}H_{60}Au_3O_3P_3$ : C, 50.76; H, 3.76.

FAB-MS  $m/z$ : 1479  $[M-L]^+$ , 1610  $[M]^+$ , 1807  $[M+Au]^+$ .

**$[Au_3(Triphos)(C\equiv CPh)_3]$  (3)**

This was prepared according to the procedure for **1** except  $[Au(C\equiv CC_6H_4Ph)]_\infty$  (72 mg, 0.24 mmol) was used instead of  $[Au(C\equiv C-L)]_\infty$ . The product was recrystallized from dichloromethane-*n*-hexane to give **2** as white crystals. Yield 97 mg, 80 %.  $^1H$  NMR ( $CDCl_3$ , 400 MHz, relative to  $Me_4Si$ ):  $\delta$  0.79 (3H, s,  $-CH_3$ ), 3.52 (6H, d,  $J = 10.6$  Hz,  $-CH_2P-$ ), 7.25 (9H, m,  $-C_6H_5-$ ), 7.44 (24H, m,  $PPh_2$  and  $-C_6H_5-$ ), 8.01 (12H, m,  $-PPh_2$ ).  $^{31}P$  NMR ( $CDCl_3$ , 202 MHz, relative to 85 %  $H_3PO_4$ ):  $\delta$  26.45. Elemental analysis, Anal. Found (%): C, 50.29; H, 3.58. Calcd. For  $C_{65}H_{54}Au_3P_3 \cdot H_2O$ : C, 50.79; H, 3.67. FAB-MS  $m/z$ : 1419  $[M-L]^+$ , 1520  $[M]^+$ , 1717  $[M+Au]^+$ .

### X-Ray Crystallography of $\text{Au}_3(\text{Triphos})(\text{C}\equiv\text{CPh})_3$ (**3**)

Crystals of complex **3** for X-ray studies were obtained by layering of *n*-hexane onto a dichloromethane solution of complex **3**. A crystal of dimensions 0.48 mm  $\times$  0.05 mm  $\times$  0.02 mm mounted in a glass capillary was used for data collection at 28 °C on a Bruker Smart CCD 1000 using graphite monochromatized Mo- $\text{K}\alpha$  radiation ( $\lambda = 0.71073$  Å). Raw frame data were integrated with SAINT<sup>1</sup> program. Semi-empirical absorption correction with SADABS<sup>2</sup> was applied.

The structure was solved by direct methods employing SHELXS-97 program<sup>3</sup> on PC. Au, P and many non-H atoms were located according to the direct methods. The positions of the other non-hydrogen atoms were found after successful refinement by full-matrix least-squares using program SHELXL-97<sup>4</sup> on PC. There were two formula units in the asymmetric unit. Two water O were also located and their occupancies were set to be 0.5 due to closure. Phenyl rings were constrained to be regular hexagon rings with bond lengths of 1.39 Å. C $\equiv$ C triple bonds were also restrained to be around 1.18(2) Å.

According to the SHELXL-97 program,<sup>4</sup> all 22320 independent reflections ( $R_{\text{int}}$ <sup>5</sup> equal to 0.0452, 15563 reflections larger than  $4\sigma(F_o)$ ) from a total 67724 reflections were participated in the full-matrix least-square refinement against  $F^2$ . These reflections were in the range  $-31 \leq h \leq 35$ ,  $-13 \leq k \leq 17$ ,  $-35 \leq l \leq 35$  with  $2\theta_{\text{max}}$  equal to 51.36°.

One crystallographic asymmetric unit consists of two formula units. In the final stage of least-squares refinement, water O atoms were refined isotropically, other non-H atoms were refined anisotropically. H atoms were generated by program SHELXL-97. The positions of H atoms were calculated based on riding mode with thermal parameters equal to 1.2 times that of the associated C atoms, and participated in the calculation of final *R*-indices<sup>6</sup>.

Convergence ( $(\Delta/\sigma)_{\text{max}} = 0.001$ , av. 0.001) for 1073 variable parameters by full-matrix least-squares

refinement on  $F^2$  reaches to  $R_1 = 0.0498$  and  $wR_2 = 0.1189$  with a goodness-of-fit of 1.043, the parameters  $a$  and  $b$  for weighting scheme are 0.0609 and 46.01. The final difference Fourier map shows maximum rest peaks and holes of 1.420 and  $-0.970 \text{ e}\text{\AA}^{-3}$  respectively.

All experimental details are given in Table S1 .

<sup>1</sup> SAINT+. SAX area detector integration program. Version 7.34A. Bruker AXS, Inc. Madison, WI.

<sup>2</sup> G. M. Sheldrick, SADABS, Empirical Absorption Correction Program. University of Göttingen: Göttingen, Germany, 2004.

<sup>3</sup> SHELXS97, Sheldrick, G. M. (1997). SHELX97. Programs for Crystal Structure Analysis (Release 97-2). University of Goettingen, Germany.

<sup>4</sup> SHELXL97, Sheldrick, G. M. (1997). SHELX97. Programs for Crystal Structure Analysis (Release 97-2). University of Goettingen, Germany.

$$^5 R_{\text{int}} = \Sigma |F_o^2 - F_o^2(\text{mean})| / \Sigma [F_o^2]$$

<sup>6</sup> Since the structure refinements are against  $F^2$ ,  $R$ -indices based on  $F^2$  are larger than (more than double) those based on  $F$ . For comparison with older refinements based on  $F$  and an OMIT threshold, a conventional index  $R_1$  based on observed  $F$  values larger than  $4\sigma(F_o)$  is also given (corresponding to Intensity  $\geq 2\sigma(I)$ ).  $wR_2 = \{\Sigma[w(F_o^2 - F_c^2)^2] / \Sigma[w(F_o^2)^2]\}^{1/2}$ ,  $R_1 = \Sigma||F_o| - |F_c|| / \Sigma|F_o|$ , The Goodness of Fit is always based on  $F^2$ :  $\text{GooF} = S = \{\Sigma[w(F_o^2 - F_c^2)^2] / (n-p)\}^{1/2}$ , where  $n$  is the number of reflections and  $p$  is the total number of parameters refined. The weighting scheme is:  $w = 1 / [\sigma^2(F_o^2) + (aP)^2 + bP]$ , where  $P$  is  $[2F_c^2 + \text{Max}(F_o^2, 0)]/3$ .

**Table S1** Crystal structure determination data for complex **3**·0.5H<sub>2</sub>O

|                                                                    |                                                                                                                                  |
|--------------------------------------------------------------------|----------------------------------------------------------------------------------------------------------------------------------|
| Empirical formula                                                  | C <sub>65</sub> H <sub>56</sub> Au <sub>3</sub> O <sub>0.5</sub> P <sub>3</sub>                                                  |
| Formula weight                                                     | 1527.90                                                                                                                          |
| <i>T</i> , K                                                       | 301 (2)                                                                                                                          |
| Wavelength                                                         | 0.71073 Å                                                                                                                        |
| Crystal system                                                     | Monoclinic                                                                                                                       |
| Space group                                                        | P2 <sub>1</sub> /c                                                                                                               |
| Unit cell dimensions                                               | <i>a</i> = 29.200(6) Å, <i>α</i> = 90°<br><i>b</i> = 13.992(2) Å, <i>β</i> = 96.25(2)°<br><i>c</i> = 28.986(6) Å, <i>γ</i> = 90° |
| Volume                                                             | 11772(4) Å <sup>3</sup>                                                                                                          |
| <i>Z</i>                                                           | 8                                                                                                                                |
| Density (calculated)                                               | 1.724 g cm <sup>-3</sup>                                                                                                         |
| Absorption coefficient                                             | 7.579 mm <sup>-1</sup>                                                                                                           |
| <i>F</i> (000)                                                     | 5848                                                                                                                             |
| Crystal size                                                       | 0.48 mm × 0.05 mm × 0.02 mm                                                                                                      |
| Theta range for data collection                                    | 1.65 to 25.68°                                                                                                                   |
| Index ranges                                                       | −31 ≤ <i>h</i> ≤ 35, −13 ≤ <i>k</i> ≤ 17, −35 ≤ <i>l</i> ≤ 35                                                                    |
| Reflections collected                                              | 67724                                                                                                                            |
| Independent reflections                                            | 22320 [ <i>R</i> (int) = 0.0452]                                                                                                 |
| Completeness to theta = 25.68°                                     | 99.8 %                                                                                                                           |
| Absorption correction                                              | None                                                                                                                             |
| Refinement method                                                  | Full-matrix least-squares on <i>F</i> <sup>2</sup>                                                                               |
| Data / restraints / parameters                                     | 22320 / 21 / 1073                                                                                                                |
| Goodness-of-fit on <i>F</i> <sup>2</sup>                           | 1.043                                                                                                                            |
| Final <i>R</i> indices <sup>[a]</sup> [ <i>I</i> > 2σ( <i>I</i> )] | <i>R</i> <sub>1</sub> = 0.0498, <i>wR</i> <sub>2</sub> = 0.1189                                                                  |
| <i>R</i> indices (all data)                                        | <i>R</i> <sub>1</sub> = 0.0830, <i>wR</i> <sub>2</sub> = 0.1343                                                                  |
| Largest diff. peak and hole                                        | 1.420 and −0.970 eÅ <sup>-3</sup>                                                                                                |

[a]  $R_{\text{int}} = \Sigma |F_o^2 - F_o^2(\text{mean})| / \Sigma [F_o^2]$ ,  $R_1 = \Sigma ||F_o| - |F_c|| / \Sigma |F_o|$  and  $wR_2 = \{\Sigma [w(F_o^2 - F_c^2)^2] / \Sigma [w(F_o^2)^2]\}^{1/2}$ .

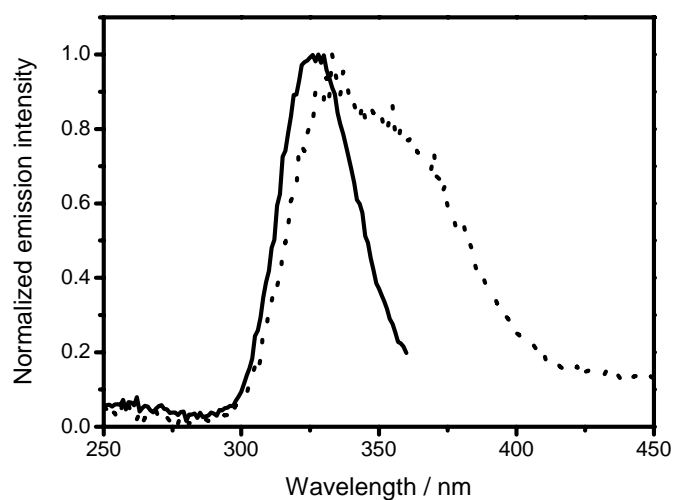

**Figure S1** Excitation spectra of **1** ( $9.13 \times 10^{-5}$  M) in the absence (—) and in the presence (---) of  $\text{Mg}^{2+}$  ( $2.8 \times 10^{-2}$  M), monitored at 450 nm and 675 nm, respectively

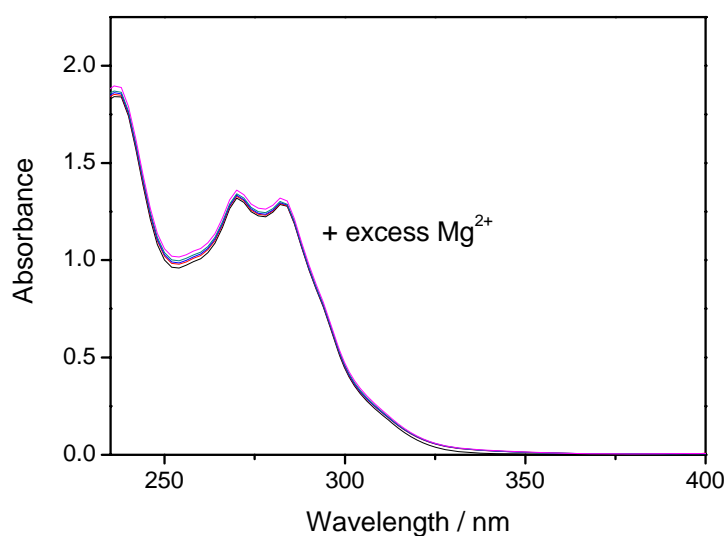

**Figure S2** UV-Vis spectral changes of complex **3** ( $1.8 \times 10^{-5}$  M) in  $\text{CH}_2\text{Cl}_2$ -MeOH (1:1 v/v, containing 0.1 M  $n\text{Bu}_4\text{NPF}_6$ ) in the presence of a large excess of  $\text{Mg}(\text{ClO}_4)_2$

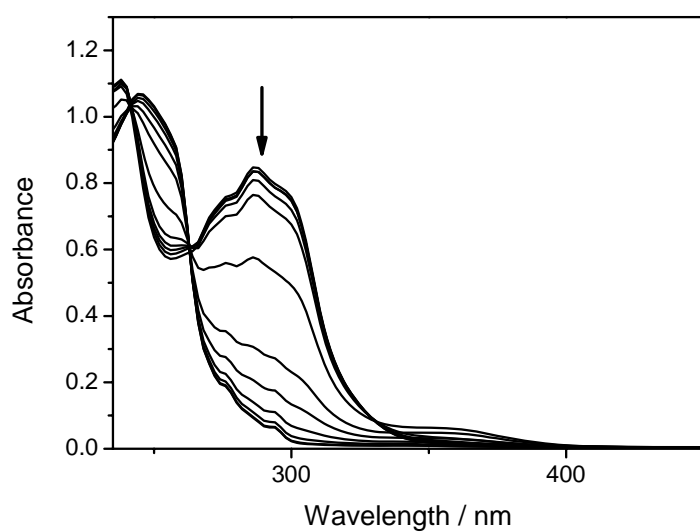

**Figure S3** UV-Vis spectral changes of complex **2** ( $1.4 \times 10^{-5}$  M) in CH<sub>2</sub>Cl<sub>2</sub>-MeOH (1:1 v/v, containing 0.1 M <sup>n</sup>Bu<sub>4</sub>NPF<sub>6</sub>) upon addition of Mg(ClO<sub>4</sub>)<sub>2</sub>

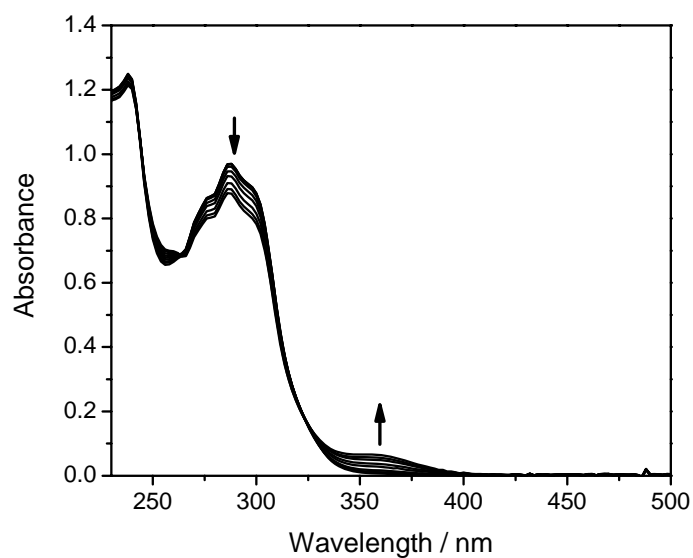

**Figure S4** UV-Vis spectral changes of complex **1** ( $1.5 \times 10^{-5}$  M) in CH<sub>2</sub>Cl<sub>2</sub>-MeOH (1:1 v/v, containing 0.1 M <sup>n</sup>Bu<sub>4</sub>NPF<sub>6</sub>) upon addition of Ca(ClO<sub>4</sub>)<sub>2</sub>
